# Supplementary material for: Macrophage-Conditioned Media Promotes Adipocyte Cancer Association, Which in Turn Stimulates Breast Cancer Proliferation and Migration
Source: MDPI journal article supplement (doi:10.3390/biom12121757), 2022-11-26
Supplement: s1 [file s1]

Supplementary Information

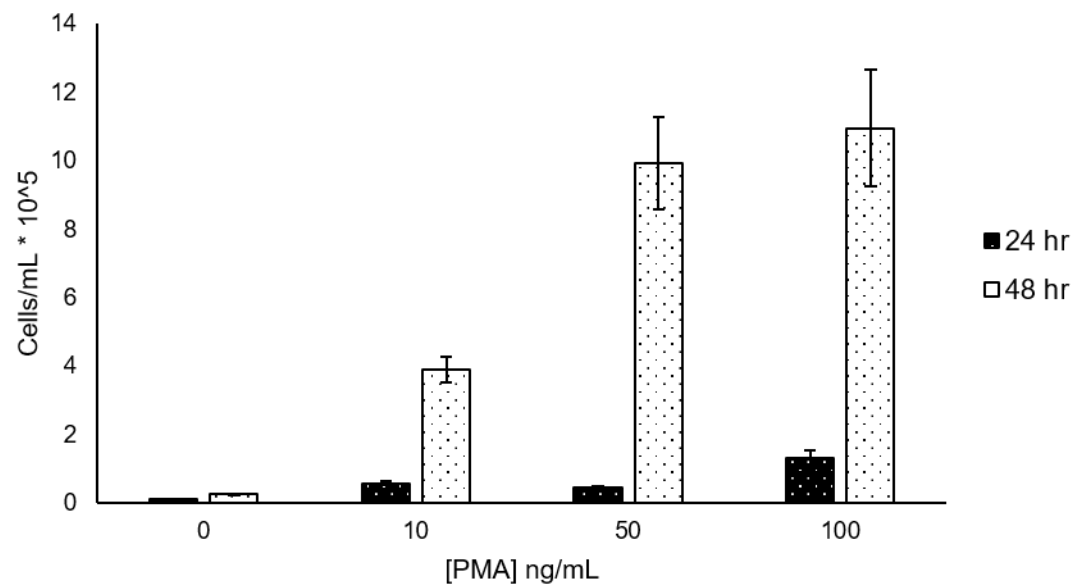

**Figure S1: Number of adherent cells after PMA treatment.** U937 monocytes were treated with 0-100 ng/mL PMA and left for 24 or 48 hours. Macrophage differentiation was determined by cell adherence. 100 ng/mL PMA for 48 hours was determined to yield the highest differentiation rate and was used for subsequent experiments. Error bars denote standard error.

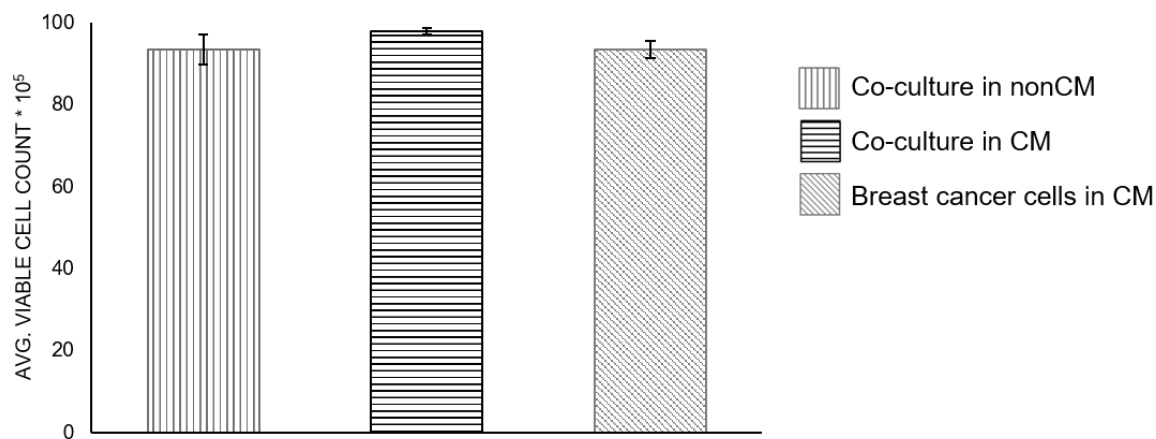

**Figure S2: MCF-7 average cell viability remained unchanged for cell count assays.** Error bars denote standard error.

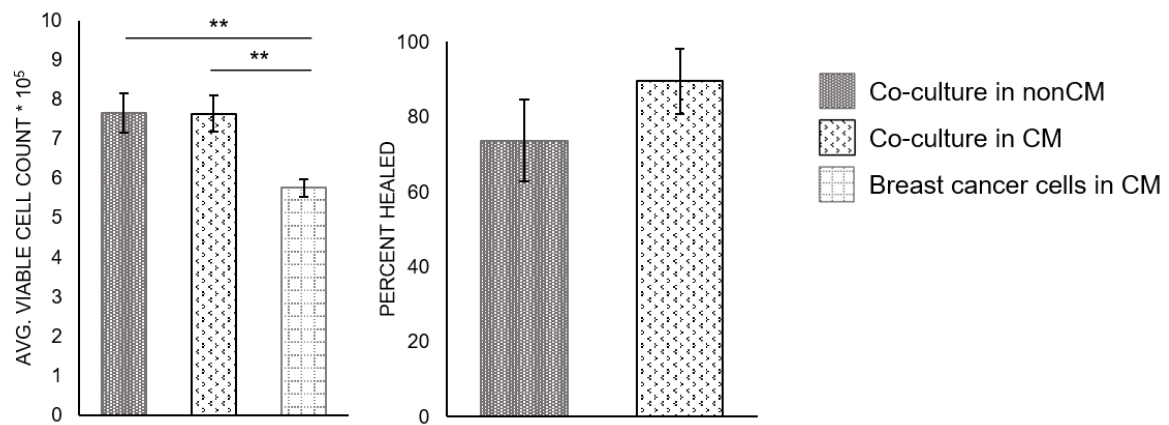

**Figure S3: MDA-MB-231 cell proliferation and migration.** Cell counts were used to determine proliferation after 3 days in co-culture with adipocytes, with macrophage CM or without macrophage CM, or alone in CM. After 3 days in co-culture with adipocytes, with macrophage CM or without macrophage CM, a scratch was made on the confluent MDA-MB-231 cell layer and migration was measured after 24 hours. Asterisk denotes significant p-value. \*\* means p-value  $\leq 0.01$ . Error bars denote standard error.

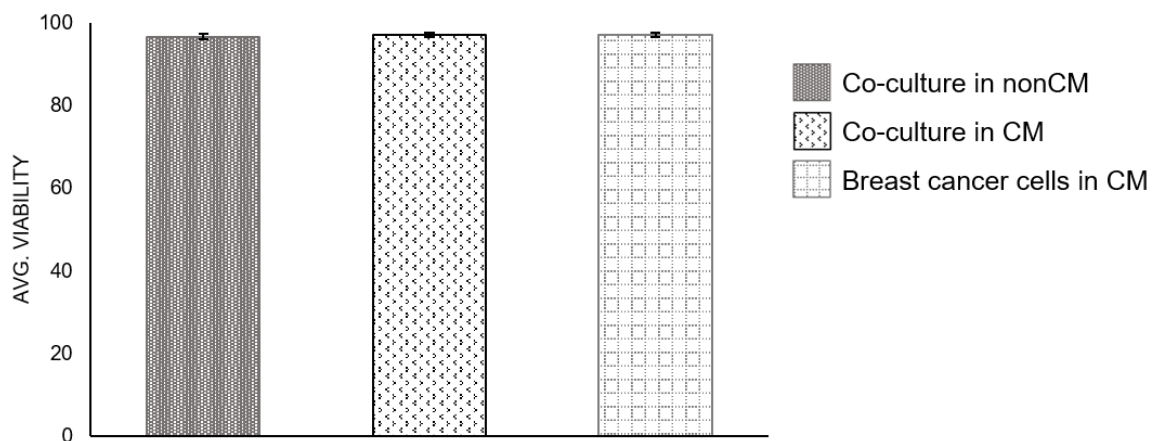

**Figure S4: MDA-MB-231 average viability remained unchanged for cell count assays.** Error bars denote standard error.
